# Supplementary material
Source: publisher site journal article supplement (https://www.dovepress.com/article/346954)
Supplement: Supplementary file 1 [file get_supplementary_file.php]

Supplementary table 1 Collinearity analysis of original variables to be included in multivariate analysis

| variables | tolerance | variance inflation factor |
| --- | --- | --- |
| age | 0.789 | 1.267 |
| stroke | 0.888 | 1.126 |
| operation site | 0.714 | 1.401 |
| operation time | 0.481 | 2.078 |
| bleeding | 0.501 | 1.997 |
| benzodiazepines | 0.883 | 1.133 |
| change of CPR | 0.811 | 1.233 |
| preoperative WBC | 0.018 | 56.152 |
| preoperative Neu | 0.022 | 45.567 |
| preoperative Lym | 0.122 | 8.210 |
| postoperative WBC | 0.004 | 254.435 |
| postoperative Neu | 0.004 | 233.462 |
| postoperative Lym | 0.098 | 10.255 |
| preoperative NLR | 0.085 | 11.745 |
| preoperative PLR | 0.101 | 9.885 |
| preoperative PWR | 0.110 | 9.131 |
| postoperative NLR | 0 | / |
| postoperative PLR | 0 | / |
| postoperative PWR | 0.191 | 5.243 |
| change of NLR | 0.102 | 9.812 |
| change of PLR | 0.144 | 6.963 |
| change of PWR | 0.150 | 6.673 |

**Abbreviations:** CRP, c-reactive protein; NLR, neutrophil-lymphocyte ratio; PLR, platelet-to-lymphocyte ratio; PWR, platelet-to-WBC ratio

Supplementary table 2 Collinearity analysis after eliminating perioperative variables of white blood cell count, neutrophil count, lymphocyte count and platelet count

| variables | tolerance | variance inflation factor |
| --- | --- | --- |
| age | 0.846 | 1.182 |
| stroke | 0.914 | 1.094 |
| operation site | 0.750 | 1.334 |
| operation time | 0.499 | 2.005 |
| bleeding | 0.507 | 1.973 |
| benzodiazepines | 0.920 | 1.087 |
| change of CRP | 0.867 | 1.153 |
| preoperative NLR | 0.128 | 7.791 |
| preoperative PLR | 0.084 | 11.896 |
| preoperative PWR | 0 | / |
| postoperative NLR | 0.100 | 10.001 |
| postoperative PLR | 0.089 | 11.260 |
| postoperative PWR | 0.189 | 5.280 |
| change of NLR | 0.140 | 7.163 |
| change of PLR | 0 | / |
| change of PWR | 0.164 | 6.090 |

**Abbreviations:** CRP, c-reactive protein; NLR, neutrophil-lymphocyte ratio; PLR, platelet-to-lymphocyte ratio; PWR, platelet-to-WBC ratio

Supplementary table 3 Collinearity analysis of variables in model 1 or model 2

| variables | | tolerance | variance inflation factor |
| --- | --- | --- | --- |
| model 1 | age | 0.853 | 1.173 |
|  | stroke | 0.911 | 1.097 |
|  | operation site | 0.753 | 1.328 |
|  | operation time | 0.520 | 1.923 |
|  | bleeding | 0.515 | 1.943 |
|  | benzodiazepines | 0.929 | 1.076 |
|  | change of CRP | 0.876 | 1.142 |
|  | preoperative NLR | 0.140 | 7.125 |
|  | preoperative PLR | 0.113 | 8.873 |
|  | preoperative PWR | 0.143 | 7.002 |
|  | postoperative NLR | 0.557 | 1.797 |
|  | postoperative PLR | 0.123 | 8.107 |
|  | postoperative PWR | 0.505 | 1.978 |
| model 2 | age | 0.867 | 1.153 |
|  | stroke | 0.943 | 1.061 |
|  | operation site | 0.762 | 1.312 |
|  | operation time | 0.536 | 1.865 |
|  | bleeding | 0.527 | 1.899 |
|  | benzodiazepines | 0.939 | 1.065 |
|  | change of CRP | 0.910 | 1.099 |
|  | change of NLR | 0.419 | 2.388 |
|  | change of PLR | 0.445 | 2.245 |
|  | change of PWR | 0.861 | 1.162 |

**Abbreviations:** CRP, c-reactive protein; NLR, neutrophil-lymphocyte ratio; PLR, platelet-to-lymphocyte ratio; PWR, platelet-to-WBC ratio
